# Supplementary material
Source: publisher site journal article supplement (https://www.dovepress.com/article/314409)
Supplement: Supplementary file 1 [file get_supplementary_file.php]

|  | Item No. | Recommendation | Page  No. |
| --- | --- | --- | --- |
| **Title and abstract** | 1 | (*a*) Indicate the study’s design with a commonly used term in the title or the abstract | Page 2, Line 29-34 |
| (*b*) Provide in the abstract an informative and balanced summary of what was done and what was found | Page 2, Line 29-37 |
| Introduction | | | |
| Background/rationale | 2 | Explain the scientific background and rationale for the investigation being reported | Page 3, Line 47-65 |
| Objectives | 3 | State specific objectives, including any prespecified hypotheses | Page 3, Line 65-67 |
| Methods | | | |
| Study design | 4 | Present key elements of study design early in the paper | Page 4, Line 93-95 |
| Setting | 5 | Describe the setting, locations, and relevant dates, including periods of recruitment, exposure, follow-up, and data collection | Page 4-5, Line 95-111 |
| Participants | 6 | (*a*) *Cohort study*—Give the eligibility criteria, and the sources and methods of selection of participants. Describe methods of follow-up  *Case-control study*—Give the eligibility criteria, and the sources and methods of case ascertainment and control selection. Give the rationale for the choice of cases and controls  *Cross-sectional study*—Give the eligibility criteria, and the sources and methods of selection of participants | Page 4, Line 81-90 |
| (*b*)*Cohort study*—For matched studies, give matching criteria and number of exposed and unexposed  *Case-control study*—For matched studies, give matching criteria and the number of controls per case | Page 4-5, Line 96-101 |
| Variables | 7 | Clearly define all outcomes, exposures, predictors, potential confounders, and effect modifiers. Give diagnostic criteria, if applicable | Page 5, Line 108-111 |
| Data sources/ measurement | 8 | For each variable of interest, give sources of data and details of methods of assessment (measurement). Describe comparability of assessment methods if there is more than one group | Page 5, Line 114-120 |
| Bias | 9 | Describe any efforts to address potential sources of bias | Page 5, Line 124-128 |
| Study size | 10 | Explain how the study size was arrived at | Page 7, Line 141-147 |
| Quantitative variables | 11 | Explain how quantitative variables were handled in the analyses. If applicable, describe which groupings were chosen and why | Page 5-6, Line 129-134 |
| Statistical methods | 12 | (*a*) Describe all statistical methods, including those used to control for confounding | Page 5-6, Line 123-137 |
| (*b*) Describe any methods used to examine subgroups and interactions | N/A |
| (*c*) Explain how missing data were addressed | N/A |
| (*d*) *Cohort study*—If applicable, explain how loss to follow-up was addressed  *Case-control study*—If applicable, explain how matching of cases and controls was addressed  *Cross-sectional study*—If applicable, describe analytical methods taking account of sampling strategy | N/A |
| (*e*) Describe any sensitivity analyses | N/A |
| Participants | 13 | (a) Report numbers of individuals at each stage of study—eg numbers potentially eligible, examined for eligibility, confirmed eligible, included in the study, completing follow-up, and analyzed | Page 7, Line 141-147 |
| (b) Give reasons for non-participation at each stage | Page 7, Line 141-147 |
| (c) Consider use of a flow diagram | Page 7, Line 146 |
| Descriptive data | 14 | (a) Give characteristics of study participants (eg demographic, clinical, social) and information on exposures and potential confounders | Page 7, Line 147-156 |
| (b) Indicate number of participants with missing data for each variable of interest | N/A |
| (c) *Cohort study*—Summarize follow-up time (eg, average and total amount) | Page 5, Line 108-111 |
| Outcome data | 15 | *Cohort study*—Report numbers of outcome events or summary measures over time | N/A |
| *Case-control study—*Report numbers in each exposure category, or summary measures of exposure | N/A |
| *Cross-sectional study—*Report numbers of outcome events or summary measures | N/A |
| Main results | 16 | (*a*) Give unadjusted estimates and, if applicable, confounder-adjusted estimates and their precision (eg, 95% confidence interval). Make clear which confounders were adjusted for and why they were included | Page 7-8, Line 158-176 |
| (*b*) Report category boundaries when continuous variables were categorized | N/A |
| (*c*) If relevant, consider translating estimates of relative risk into absolute risk for a meaningful time period | N/A |
| Other analyses | 17 | Report other analyses done—eg analyses of subgroups and interactions, and sensitivity analyses | N/A |
| Key results | 18 | Summarize key results with reference to study objectives | Page 9, Line 187-192 |
| Limitations | 19 | Discuss limitations of the study, taking into account sources of potential bias or imprecision. Discuss both direction and magnitude of any potential bias | Page 10-11, Line 230-248 |
| Interpretation | 20 | Give a cautious overall interpretation of results considering objectives, limitations, multiplicity of analyses, results from similar studies, and other relevant evidence | Page 9-10, Line 193-229 |
| Generalizability | 21 | Discuss the generalizability (external validity) of the study results | Page 10, Line 233-239 |
| Other information |
| Funding | 22 | Give the source of funding and the role of the funders for the present study and, if applicable, for the original study on which the present article is based | N/A |

Supplemental table 1: STROBE checklist.

**Notes:** Adapted from von Elm E, Altman DG, Egger M, et al. The Strengthening the Reporting of Observational Studies in Epidemiology (STROBE) statement: guidelines for reporting observational studies. *PLoS Med.* 2007;4(10): e296. Creative Commons license and disclaimer available from: http://creativecommons.org/licenses/by/4.0/legalcode.9

Abbreviations: STROBE, Strengthening the Reporting of Observational Studies in Epidemiology.

| Teneligliptin group | | | | | | | | Linagliptin group | | | | | | | |
| --- | --- | --- | --- | --- | --- | --- | --- | --- | --- | --- | --- | --- | --- | --- | --- |
| Patient number | Age  (years) | Sex | Body mass index  (kg/m2) | HbA1c (%) | eGFR  (ml/  min  /1.73m2) | Urinary protein excretion  (g/gCr) | Propensity score | Patient number | Age  (years) | Sex | Body mass index  (kg/m2) | HbA1c  (%) | eGFR  (ml/  min  /1.73m2) | Urinary protein excretion  (g/gCr) | Propensity score |
| 3 | 87 | Female | 28.5 | 7.7 | 17.6 | 0.2 | 0.44 | 6 | 65 | Female | 25.0 | 6.9 | 25.7 | 0.5 | 0.43 |
| 4 | 80 | Male | 22.1 | 7.4 | 25.3 | 0.3 | 0.52 | 5 | 48 | Male | 25.6 | 6.8 | 13.0 | 2.2 | 0.48 |
| 5 | 60 | Male | 31.0 | 6.2 | 15.0 | 2.1 | 0.39 | 16 | 69 | Female | 24.8 | 6.6 | 30.4 | 0.3 | 0.36 |
| 6 | 74 | Female | 20.8 | 7.3 | 30.3 | 0.4 | 0.40 | 21 | 58 | Female | 29.1 | 7.3 | 27.9 | 1.2 | 0.40 |
| 7 | 75 | Male | 29.5 | 6.2 | 17.9 | 0.5 | 0.52 | 20 | 67 | Female | 22.6 | 6.9 | 21.0 | 3.6 | 0.50 |
| 8 | 75 | Female | 27.5 | 7.1 | 30.5 | 0.3 | 0.66 | 4 | 70 | Male | 28.9 | 7.5 | 34.3 | 0.5 | 0.67 |
| 9 | 58 | Female | 22.6 | 5.9 | 22.9 | 3.4 | 0.63 | 1 | 51 | Male | 24.7 | 6.0 | 13.4 | 5.6 | 0.60 |
| 11 | 76 | Female | 23.5 | 6.3 | 22.4 | 0.3 | 0.48 | 17 | 80 | Female | 20.6 | 7.8 | 34.3 | 0.4 | 0.45 |
| 13 | 86 | Male | 24.4 | 7.4 | 15.7 | 2.7 | 0.91 | 10 | 87 | Male | 22.6 | 6.5 | 25.9 | 0.4 | 0.89 |
| 14 | 78 | Male | 22.4 | 5.9 | 11.3 | 1.5 | 0.65 | 18 | 65 | Female | 25.1 | 7.5 | 11.7 | 1.1 | 0.63 |
| 15 | 72 | Female | 27.4 | 7.5 | 11.3 | 0.2 | 0.23 | 14 | 78 | Male | 25.2 | 7.8 | 27.5 | 1.1 | 0.20 |
| 16 | 78 | Male | 26.2 | 6.0 | 44.5 | 0.6 | 0.17 | 9 | 77 | Male | 23.7 | 7.1 | 40.6 | 3.2 | 0.15 |
| 17 | 74 | Male | 22.4 | 7.1 | 29.7 | 0.9 | 0.31 | 15 | 77 | Male | 17.8 | 7.8 | 29.7 | 1.5 | 0.31 |

Supplemental table 2: Characteristics of the propensity score matched pairs.

Abbreviations: eGFR, estimated glomerular filtration rate; HbA1c, glycated hemoglobin.
